# Supplementary material
Source: PubMed Central journal article supplement (PMC2765464)
Supplement: NIHMS105882-supplement-1.pdf [file NIHMS105882-supplement-1.pdf]

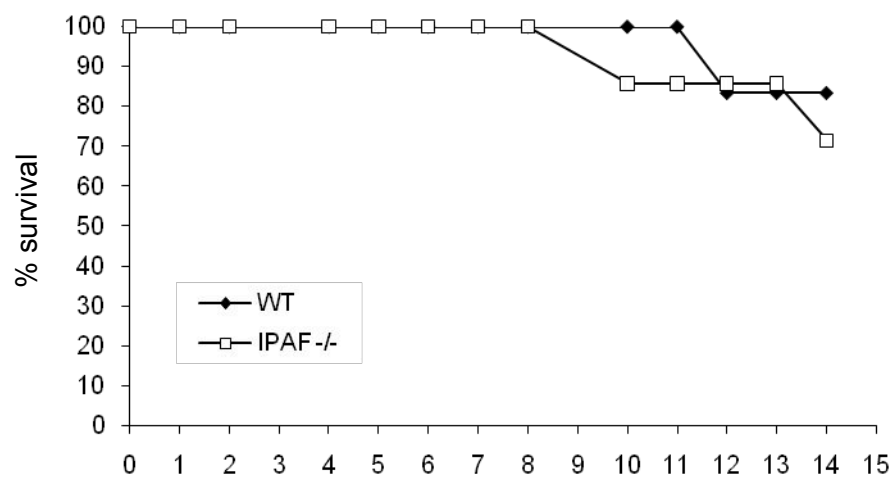

Supplementary Figure 1

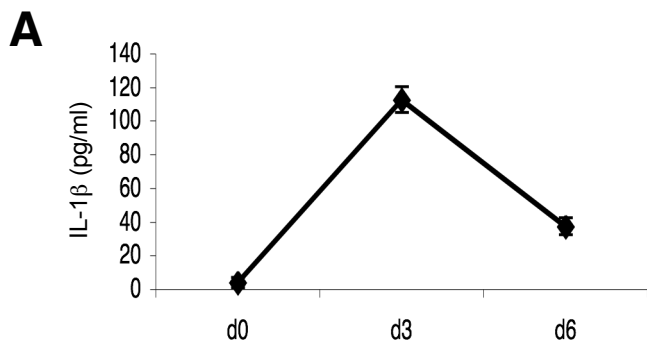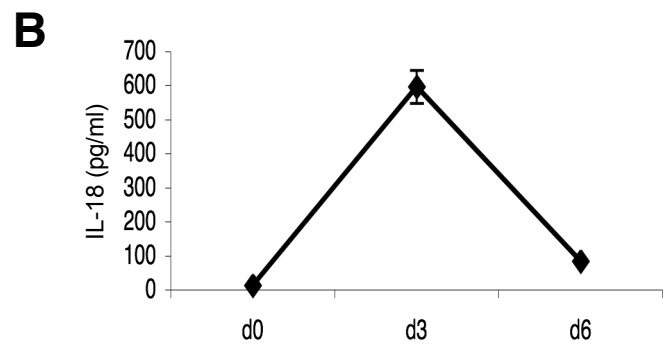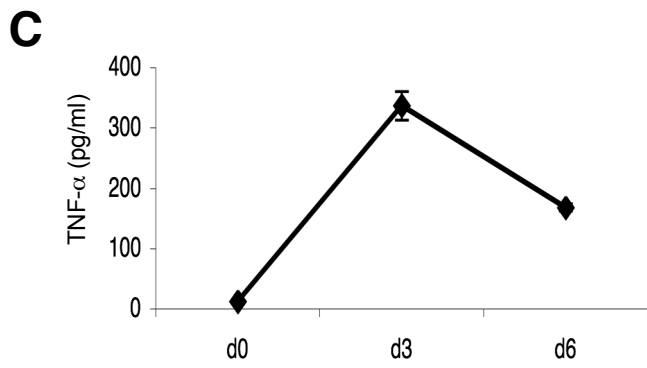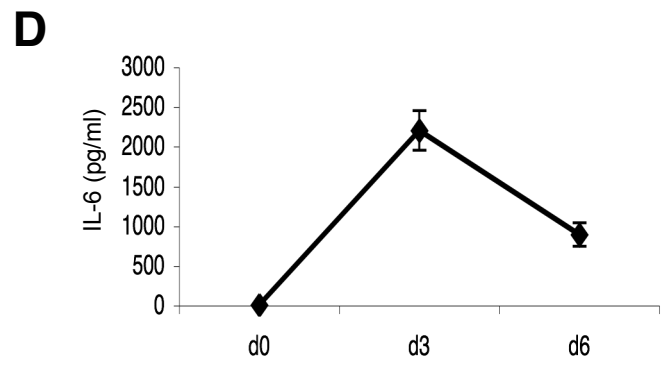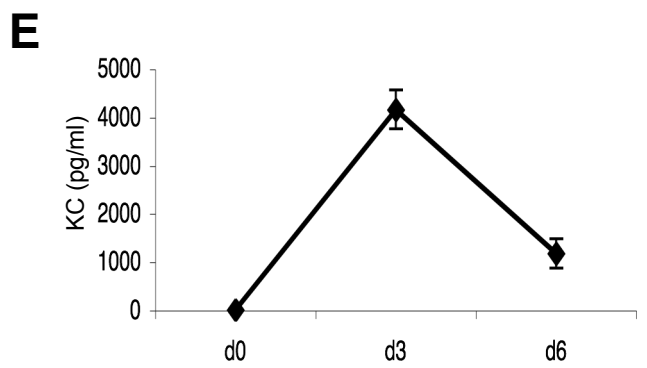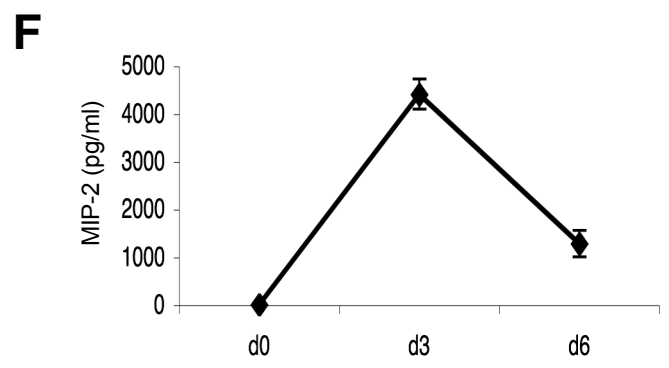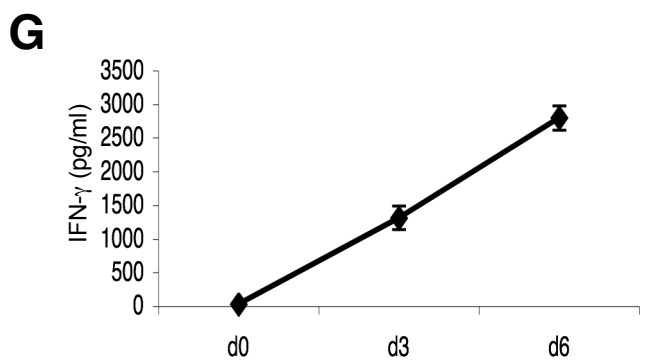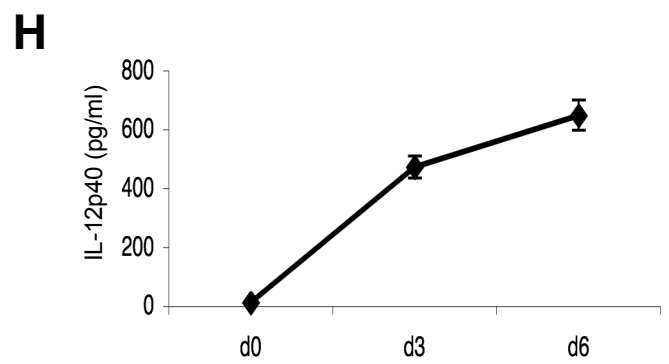

Supplementary Figure 2

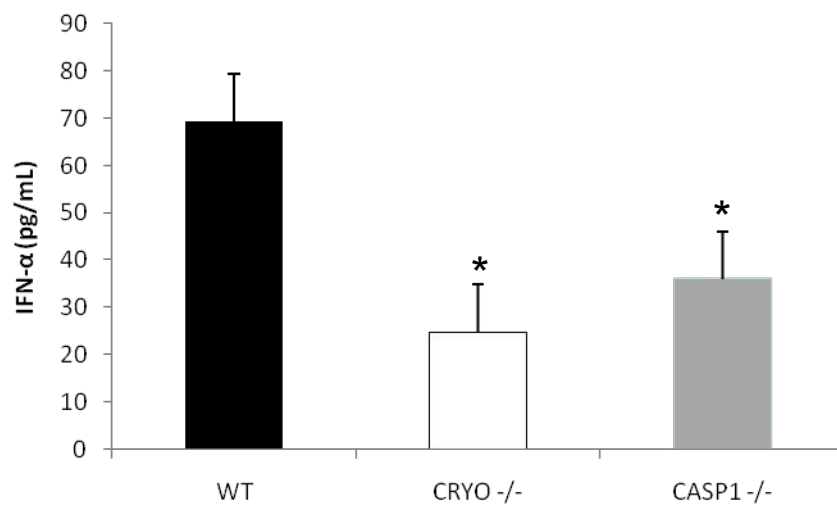

**Supplementary Figure 3**

**A**

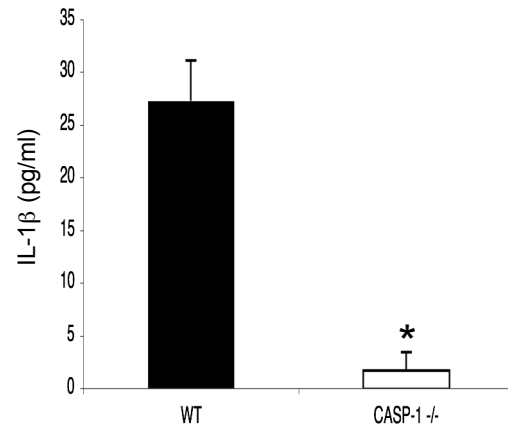

**B**

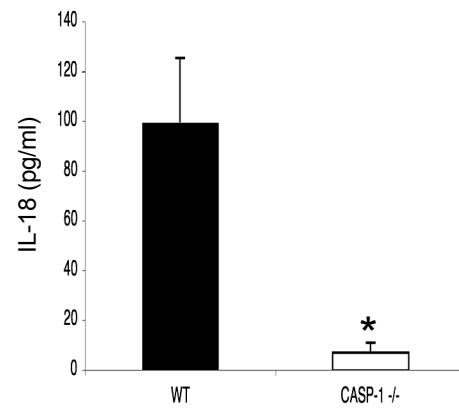

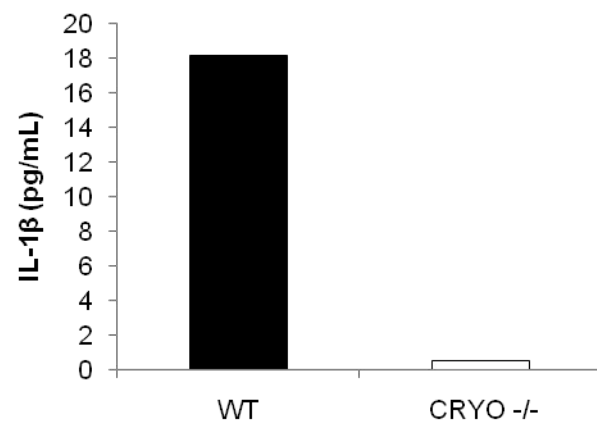

**Supplementary Figure 5**

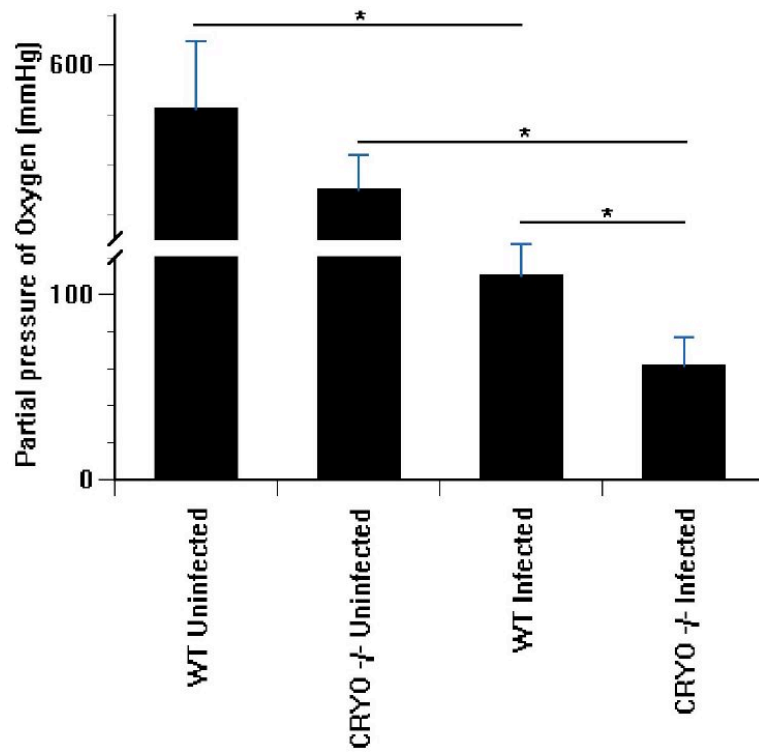

Supplementary Figure 6
